# Supplementary material for: Sorcin Activates the Brain PMCA and Blocks the Inhibitory Effects of Molecular Markers of Alzheimer’s Disease on the Pump Activity
Source: MDPI journal article supplement (doi:10.3390/ijms22116055), 2021-06-03
Supplement: s1 [file s1]

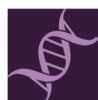

Supplementary Materials

# Sorcin Activates the Brain PMCA and Blocks the Inhibitory Effects of Molecular Markers of Alzheimer's Disease on the Pump Activity

Maria Berrocal, Lucia Saez and Ana M. Mata \*

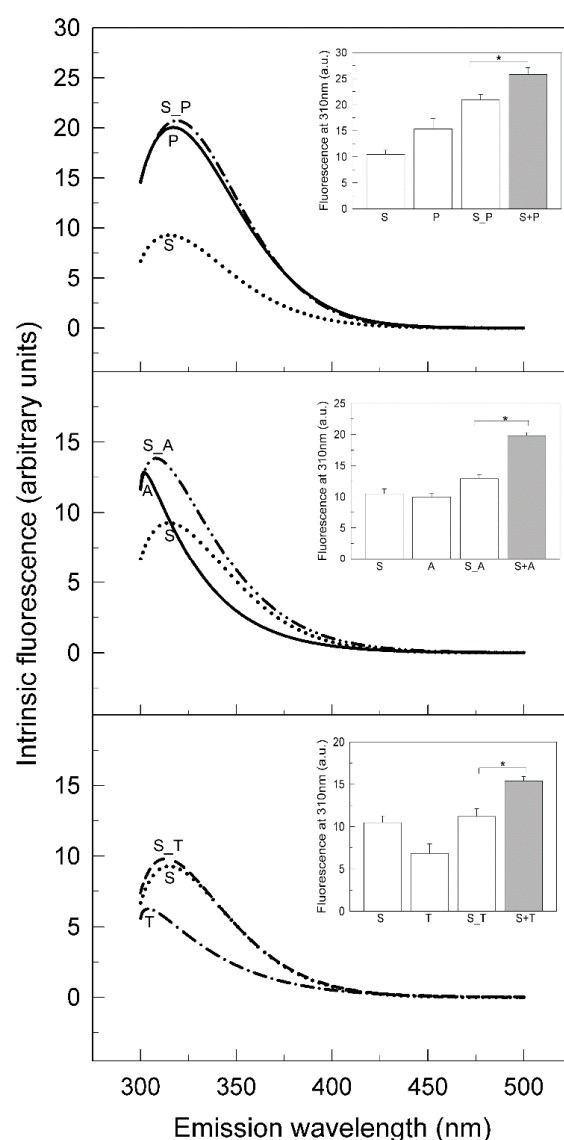

**Figure S1.** Steady-state emission spectra of the intrinsic fluorescence of sorcin, PMCA, A $\beta$ , and tau. Spectra of 1  $\mu$ M sorcin (S), 2.5  $\mu$ g of PMCA (P), 30  $\mu$ M of A $\beta$ 1-42 (A) and 300 nM tau (T) in 100  $\mu$ L of fluorescence buffer were recorded separately and after incubating S with P (S-P) or A (S-A) or T (S-T). Inserts show the maximum signal of each spectrum (white bars) and their sum (S+P, S+A, S+T, grey bars). Data are mean  $\pm$  SE from four different experiments (\*  $p \leq 0.001$ ).

## Supplementary Methods

### *Determination of conformational changes by fluorescence spectroscopy*

The intrinsic fluorescence of tyrosine residues in sorcin, PMCA, A $\beta$  and tau was used to detect conformational changes due to their interactions. 1  $\mu$ M sorcin, 2.5  $\mu$ g PMCA, 30  $\mu$ M of 2h aged A $\beta$  and 300 nM tau were incubated separately or together in 100  $\mu$ L of 150 mM PBS (pH 7.4), 100 mM KCl and 0.1 mM EDTA (fluorescence buffer), in Microfluor-1 black plates (384 wells). Fluorescence intensities were monitored in a Varioskan fluorescence spectrophotometer with the excitation wavelength set at 280 nm, and the emission spectra recorded between 300–500 nm.
